# Supplementary material for: n-3 Polyunsaturated Fatty Acids Decrease Long-Term Diabetic Risk of Offspring of Gestational Diabetes Rats by Postponing Shortening of Hepatic Telomeres and Modulating Liver Metabolism
Source: PubMed Central journal article supplement (PMC6683104; doi:10.3390/nu11071699), 2019-07-23
Supplement: nutrients-11-01699-s001.pdf [file nutrients-11-01699-s001.pdf]

**Supplementary Figure S1.** Score plots of PCA and OPLS-DA of all groups and pairwise OPLS-DA between groups and corresponding permutation tests of liver when offspring grew to 11 months old. n=8 ~ 10 rats/group.

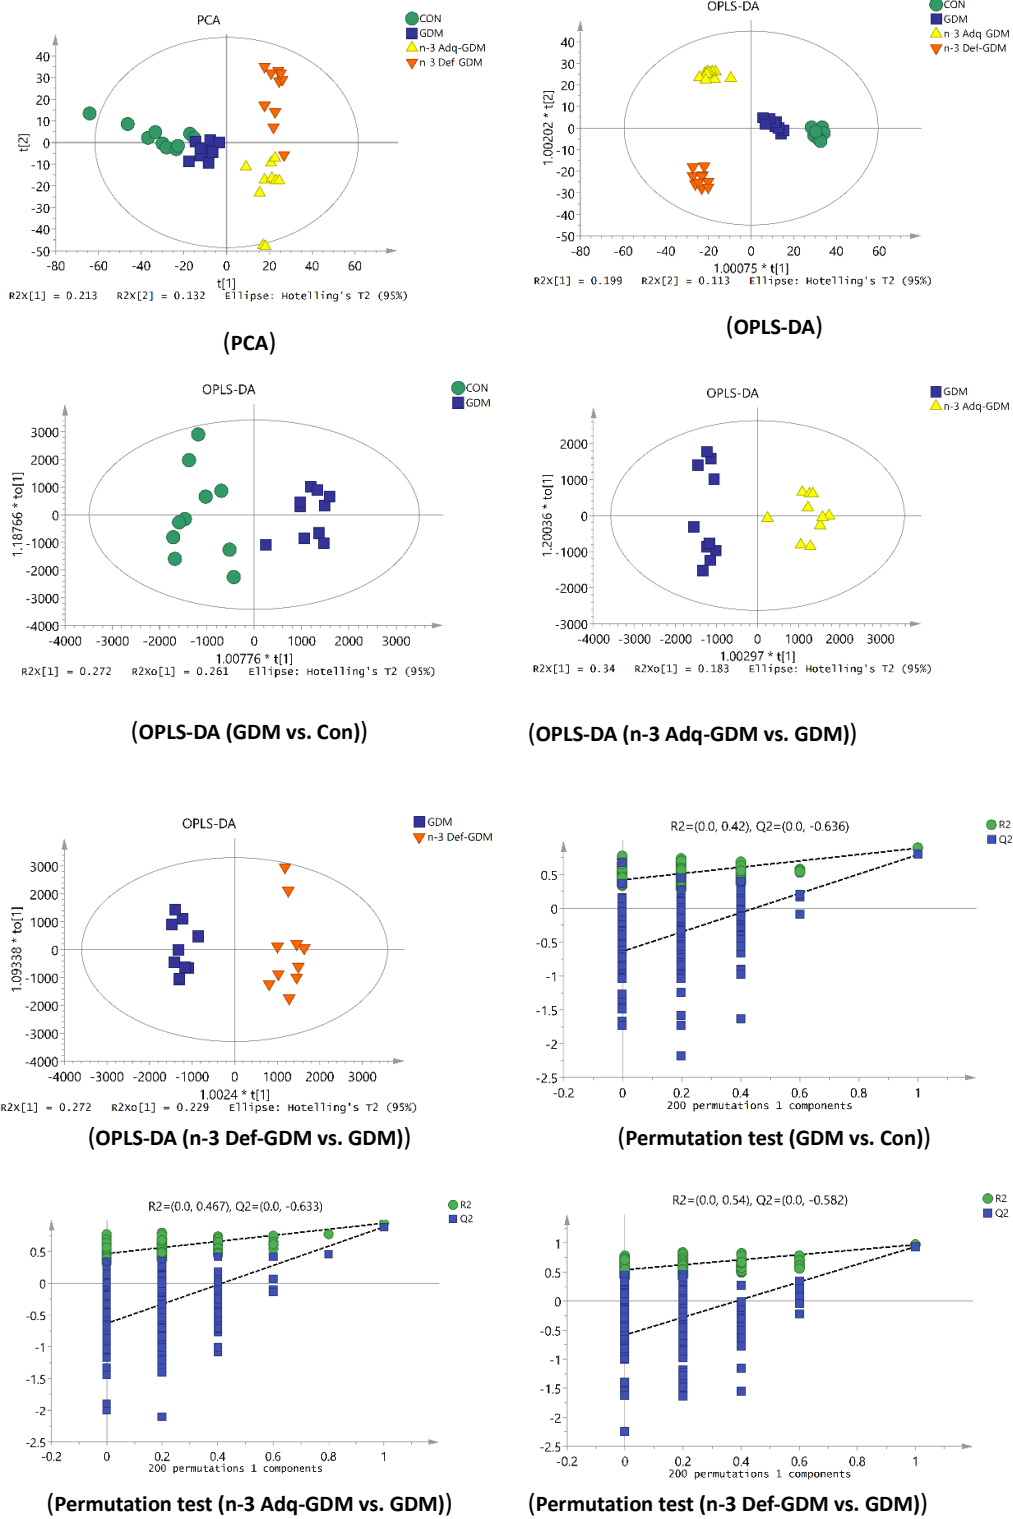

**Supplementary Figure S2.** Metabolic pathway enrichment maps of liver of offspring at 11 months old based on changed metabolites between GDM offspring vs Control offspring

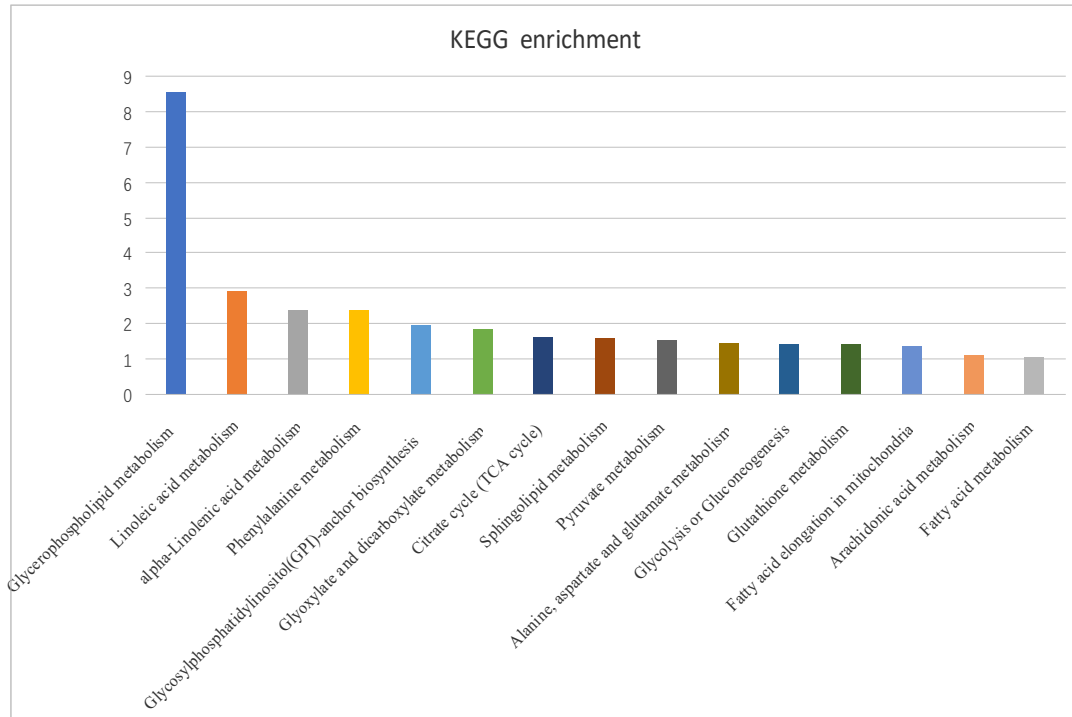

**Supplementary Figure S3.** Effect of n-3 PUFA on body weight of gestational diabetes mellitus (GDM) offspring. Bars are mean  $\pm$ SD. n=8 ~ 12 offspring rats/group. \*P<0.05, \*\*P<0.01, vs Control offspring (Con); #P<0.05, vs GDM offspring (GDM); §P<0.05, vs n-3 Adequate-GDM offspring (n-3 Adq-GDM).

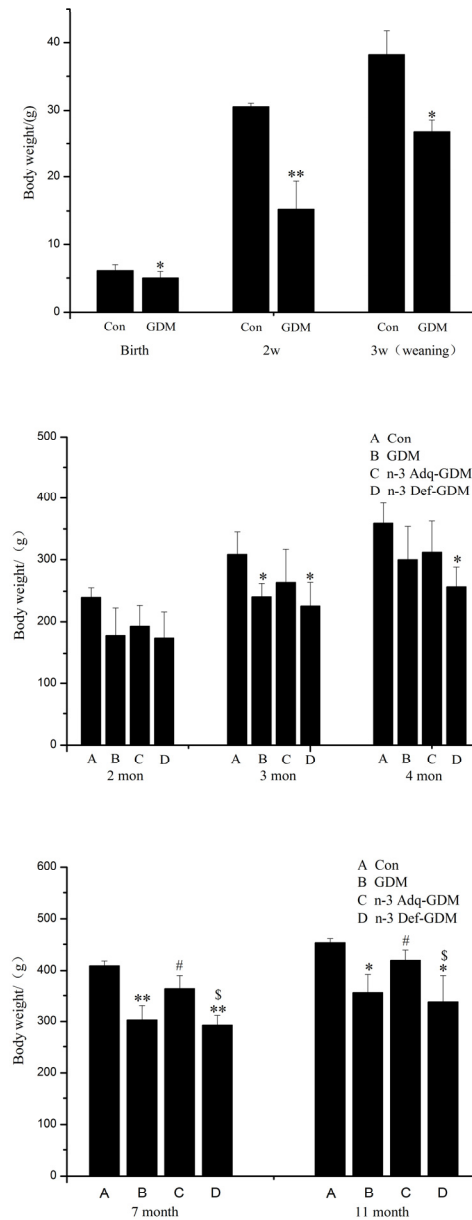

**Supplementary Figure S4.** Effect of n-3 PUFA on TG and TC in liver of gestational diabetes mellitus (GDM) offspring. (A) TG; (B) TC. Bars are mean  $\pm$ SD. n=8 ~ 10 offspring rats/group. \*P<0.05, \*\*P<0.01, vs Control offspring (Con); #P<0.05, ###P<0.01, vs GDM offspring (GDM); \$\$P<0.01, vs n-3 Adequate-GDM offspring (n-3 Adq-GDM).

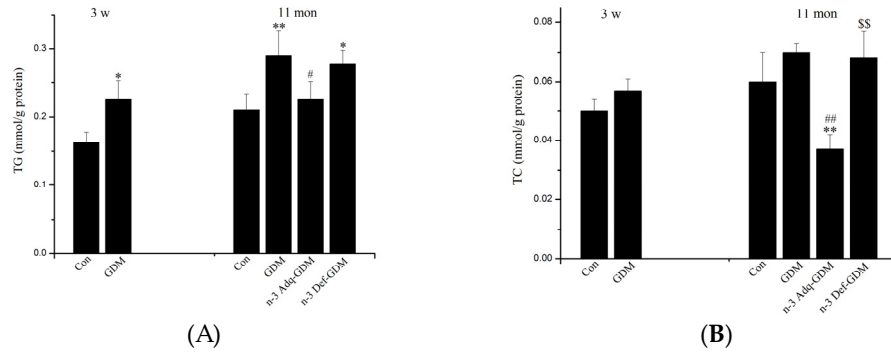

**Supplementary Table S1.** R<sup>2</sup>Y and Q<sup>2</sup>Y of pairwise OPLS-DA model.

|       | GDM vs. Con                                  | n-3 Adq-GDM vs. GDM                          | n-3 Def-GDM vs. GDM                          |
|-------|----------------------------------------------|----------------------------------------------|----------------------------------------------|
| Liver | R <sup>2</sup> Y:0.88, Q <sup>2</sup> Y:0.79 | R <sup>2</sup> Y:0.94, Q <sup>2</sup> Y:0.88 | R <sup>2</sup> Y:0.97, Q <sup>2</sup> Y:0.93 |

**Supplementary Table S2.** Metabolites altered in liver of GDM offspring at 11 months old and modulating effects of n-3 PUFA.

| Identification                                                           | RT (Min) | m/z      | Change trend |               |               |
|--------------------------------------------------------------------------|----------|----------|--------------|---------------|---------------|
|                                                                          |          |          | GDM vs Con   | n-3adq vs GDM | n-3def vs GDM |
| 1-[4,9-Dihydro-2-(methylthio)-1,3-thiazino[6,5-b]indol-4-yl]-2-propanone | 0.83     | 162.0271 | ↓            | ↑**           | -             |
| 1-Arachidonoylglycerophosphoinositol                                     | 12.22    | 643.2902 | ↑            | ↓*            | -             |
| 2-Hydroxy-4-oxo-5,12-heneicosadien-1-yl acetate                          | 17.68    | 761.5907 | ↑            | ↓*            | -             |
| Arginyl-Glutamic acid                                                    | 9.00     | 616.1801 | ↑            | ↓*            | -             |
| D-altro-D-manno-Heptose                                                  | 0.83     | 233.0610 | ↓            | ↑**           | ↑**           |
| Glutathione                                                              | 0.83     | 308.0888 | ↓            | ↑**           | -             |
| Isopetasoside                                                            | 16.52    | 397.2217 | ↑            | ↓*            | -             |
| LysoPC(22:6(4Z,7Z,10Z,13Z,16Z,19Z))                                      | 11.54    | 568.3379 | ↓            | ↑**           | ↓**           |
| LysoPC(P-18:1(9Z))                                                       | 14.08    | 506.3663 | ↑            | ↓**           | ↓**           |
| MG(0:0/20:5(5Z,8Z,11Z,14Z,17Z)/0:0)                                      | 14.47    | 377.2693 | ↑            | ↓**           | -             |
| N2-Fructopyranosylarginine                                               | 16.52    | 96.0324  | ↑            | ↓*            | ↑**           |
| N-Ethyl trans-2-cis-6-nonadienamide                                      | 8.23     | 464.2876 | ↑            | ↓*            | ↓**           |
| Nitrate                                                                  | 18.01    | 84.9775  | ↑            | ↓**           | ↓**           |
| PC(14:0/18:0)                                                            | 17.74    | 756.5515 | ↑            | ↓*            | -             |
| PC(14:0/18:2(9Z,12Z))                                                    | 17.45    | 752.5449 | ↑            | ↓*            | -             |
| PC(14:0/20:3(5Z,8Z,11Z))                                                 | 17.02    | 756.5533 | ↑            | ↓**           | -             |
| PC(16:0/18:2(9Z,12Z))                                                    | 13.71    | 780.5536 | ↓            | ↑**           | ↑*            |
| PC(16:0/22:4(7Z,10Z,13Z,16Z))                                            | 17.97    | 832.5796 | ↑            | ↓**           | -             |
| PC(16:0/22:5(7Z,10Z,13Z,16Z,19Z))                                        | 16.69    | 830.5665 | ↑            | ↓**           | -             |
| PE(14:0/22:2(13Z,16Z))                                                   | 16.01    | 744.5584 | ↑            | ↓*            | -             |
| PE(18:3(6Z,9Z,12Z)/P-18:1(11Z))                                          | 16.64    | 724.5284 | ↑            | ↓*            | -             |
| PE(20:3(5Z,8Z,11Z)/P-18:1(11Z))                                          | 16.01    | 769.5569 | ↑            | ↓**           | -             |
| PE(O-16:1(1Z)/22:6(4Z,7Z,10Z,13Z,16Z,19Z))                               | 16.71    | 748.5318 | ↓            | ↑**           | -             |
| PE-NMe(18:2(9Z,12Z)/18:1(11Z))                                           | 14.04    | 756.5553 | ↑            | ↓*            | -             |
| PS(22:2(13Z,16Z)/15:0)                                                   | 17.78    | 824.5396 | ↑            | ↓*            | -             |
| 2,5-Dichloro-4-oxohex-2-enedioate                                        | 17.91    | 226.9504 | ↑            | -             | ↓**           |

|                                             |       |          |   |   |      |
|---------------------------------------------|-------|----------|---|---|------|
| 2,8-Dihydroxyadenine                        | 0.79  | 116.0814 | ↑ | - | -    |
| Adenosine monophosphate                     | 0.83  | 348.0719 | ↑ | - | -    |
| Dihydroasparagusic acid                     | 18.23 | 96.9773  | ↓ | - | -    |
| Hexyl benzoate                              | 10.15 | 583.3291 | ↑ | - | -    |
| LysoPC(15:0)                                | 14.02 | 482.3192 | ↓ | - | ↓ *  |
| LysoPC(16:0)                                | 11.95 | 496.3401 | ↑ | - | -    |
| LysoPC(18:0)                                | 13.71 | 524.3702 | ↓ | - | -    |
| LysoPC(18:1(9Z))                            | 12.70 | 522.3575 | ↓ | - | ↓ ** |
| LysoPE(0:0/18:0)                            | 13.67 | 482.3279 | ↓ | - | -    |
| LysoPE(0:0/20:2(11Z,14Z))                   | 11.89 | 528.3044 | ↓ | - | ↓ ** |
| LysoPE(18:0/0:0)                            | 13.67 | 341.3063 | ↓ | - | ↓ *  |
| MG(0:0/18:1(11Z)/0:0)                       | 15.88 | 379.2849 | ↓ | - | ↓ ** |
| N2-Fructopyranosylarginine                  | 14.20 | 337.1706 | ↑ | - | -    |
| Palmitic acid                               | 8.64  | 274.2722 | ↑ | - | -    |
| PC(18:0/18:3(9Z,12Z,15Z))                   | 15.59 | 784.5858 | ↓ | - | ↑ *  |
| PC(18:0/22:6(4Z,7Z,10Z,13Z,16Z,19Z))        | 17.02 | 856.5822 | ↓ | - | -    |
| PC(18:0/P-18:1(11Z))                        | 16.01 | 794.6018 | ↑ | - | -    |
| PE(14:0/22:4(7Z,10Z,13Z,16Z))               | 17.04 | 762.5082 | ↓ | - | -    |
| PE(15:0/24:0)                               | 15.97 | 812.6143 | ↓ | - | -    |
| PE(16:0/20:4(5Z,8Z,11Z,14Z))                | 17.04 | 144.9913 | ↓ | - | ↓ ** |
| PE(16:0/22:4(7Z,10Z,13Z,16Z))               | 16.12 | 790.5354 | ↓ | - | -    |
| PE(20:3(5Z,8Z,11Z)/22:5(4Z,7Z,10Z,13Z,16Z)) | 15.04 | 833.5901 | ↓ | - | -    |
| PE(P-16:0e/0:0)                             | 12.70 | 438.3024 | ↓ | - | ↓ *  |
| PE-NMe(18:0/20:1(11Z))                      | 14.29 | 810.5989 | ↓ | - | -    |
| PE-NMe(18:3(9Z,12Z,15Z)/20:0)               | 17.45 | 784.5837 | ↑ | - | ↑ ** |
| PE-NMe2(18:1(9Z)/18:1(9Z))                  | 17.20 | 772.5825 | ↑ | - | ↑ *  |
| PG(16:0/18:1(11Z))                          | 15.59 | 766.5679 | ↓ | - | -    |
| PGP(18:0/22:4(7Z,10Z,13Z,16Z))              | 17.80 | 929.5263 | ↑ | - | -    |
| PS(16:0/16:0)                               | 16.21 | 736.5092 | ↓ | - | ↓ *  |
| SM(d18:0/16:1(9Z))                          | 17.74 | 725.5534 | ↑ | - | ↑ ** |

|                                      |       |          |   |      |      |
|--------------------------------------|-------|----------|---|------|------|
| TG(8:0/i-16:0/i-17:0)                | 15.59 | 731.6100 | ↓ | -    | -    |
| 25-Acetylvulgaroside 25              | 11.56 | 479.2993 | ↓ | ↓ *  | -    |
| Araliacerebroside                    | 16.69 | 732.5555 | ↑ | ↑ *  | ↑ *  |
| Lysyl-Methionine                     | 13.25 | 555.2979 | ↑ | ↑ ** | -    |
| Oleamide                             | 15.63 | 265.2553 | ↓ | ↓ ** | ↓ ** |
| PA(20:4(5Z,8Z,11Z,14Z)/24:1(15Z))    | 17.06 | 824.6194 | ↓ | ↓ *  | ↓ *  |
| PC(16:0/22:6(4Z,7Z,10Z,13Z,16Z,19Z)) | 17.32 | 828.5448 | ↑ | ↑ ** | ↑ *  |
| PC(DiMe(9,3)/DiMe(9,3))              | 15.57 | 833.5899 | ↓ | ↓ ** | -    |
| Tryptophyl-Proline                   | 12.20 | 603.2981 | ↓ | ↓ *  | -    |

The "↑" and "↓" arrows represent a significant increasing or decreasing trend of metabolites of GDM offspring. Green arrows show modulating effect on altered metabolites, and the red shows aggravating result. "-" means no significant change. \*P<0.05, \*\*P<0.01, vs GDM offspring.
